# Supplementary material for: Light and Temperature as Dual Stimuli Lead to Self-Assembly of Hyperbranched Azobenzene-Terminated Poly(N-isopropylacrylamide)
Source: MDPI journal article supplement (doi:10.3390/polym8050183), 2016-05-07
Supplement: s1 [file s1]

# Supplementary Materials: Light and Temperature as Dual Stimuli Lead to Self-Assembly of Hyperbranched Azobenzene-Terminated Poly(N-isopropylacrylamide)

Wenyan Huang, Jing Yang, Yunqing Xia, Xuezi Wang, Xiaoqiang Xue, Hongjun Yang, Guifang Wang, Bibiao Jiang, Fang Li and Sridhar Komarneni

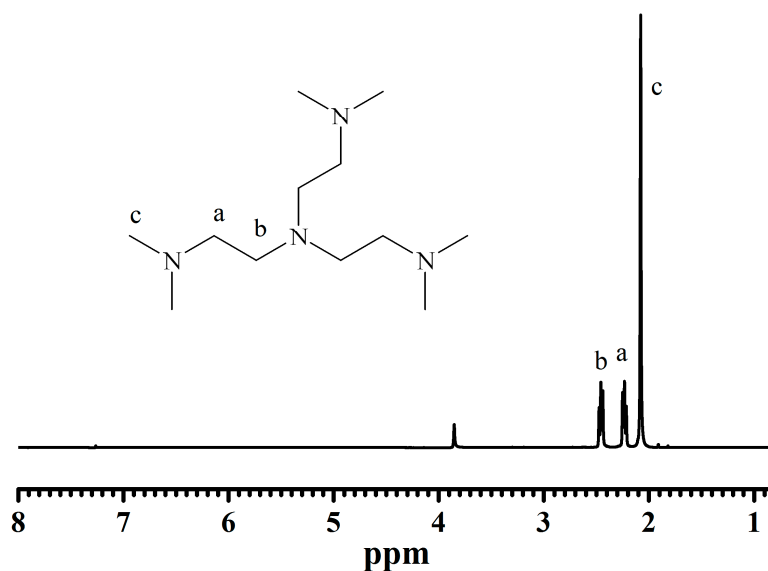

Figure S1.  $^1\text{H}$ -NMR spectrum of Tris[2-(dimethylamino)ethyl]amine ( $\text{Me}_6\text{TREN}$ ) in  $\text{CDCl}_3$ .

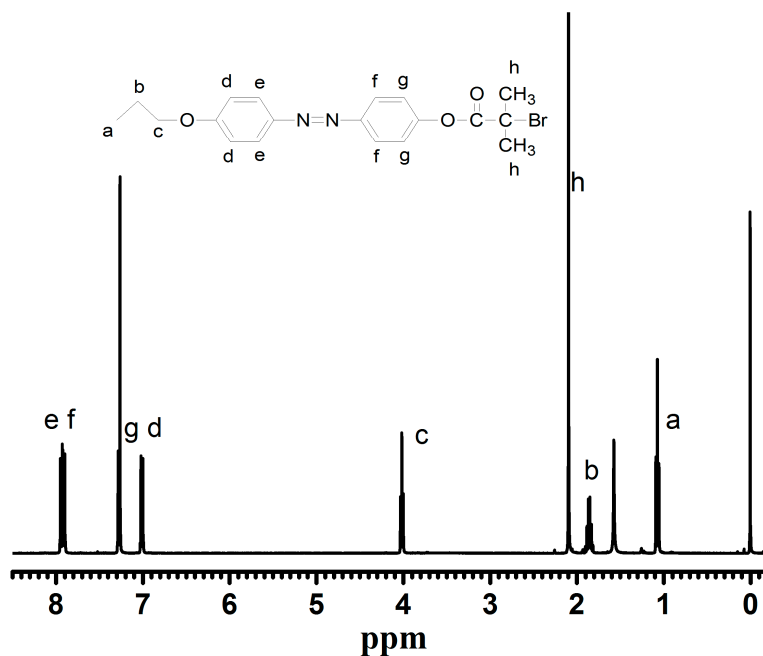

Figure S2.  $^1\text{H}$ -NMR spectrum of  $\text{C}_3\text{H}_7\text{OC-Azo-Br}$  in  $\text{CDCl}_3$ .

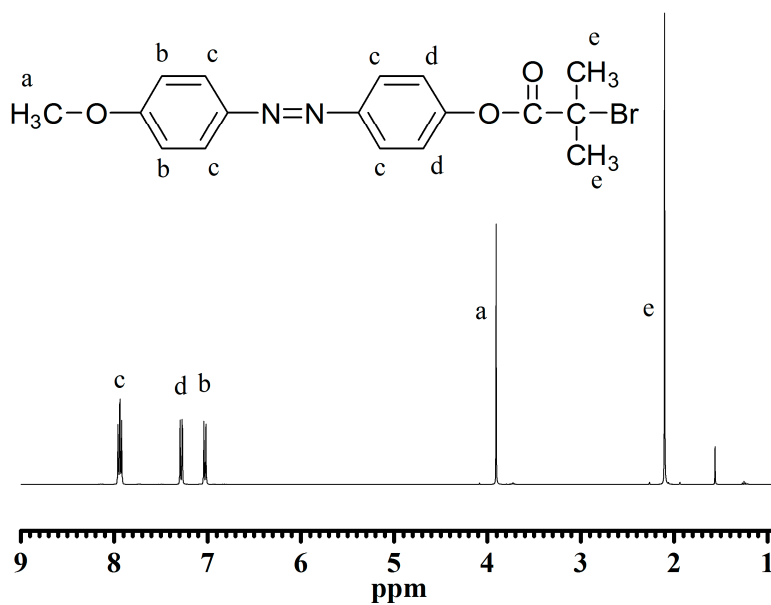

Figure S3.  $^1\text{H-NMR}$  spectrum of  $\text{CH}_3\text{O-Azo-Br}$  in  $\text{CDCl}_3$ .

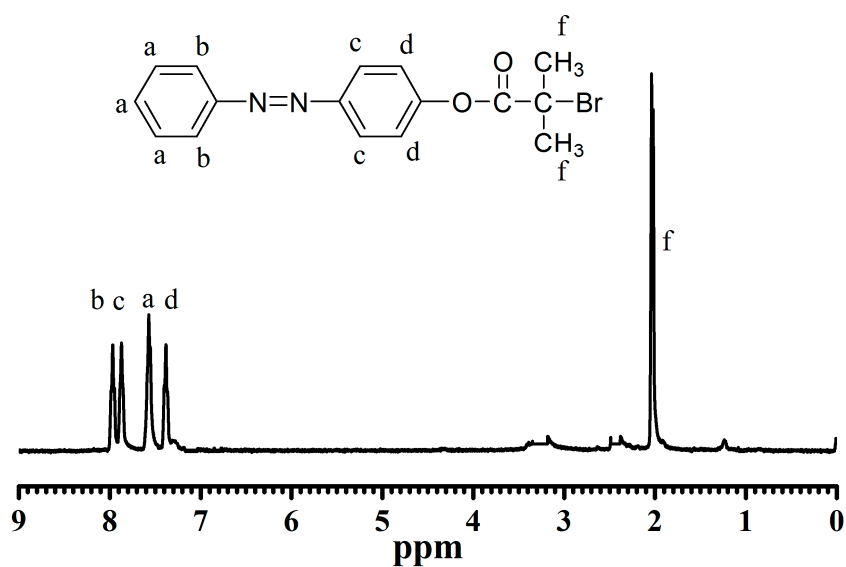

Figure S4.  $^1\text{H-NMR}$  spectrum of  $\text{Azo-Br}$  in  $\text{CDCl}_3$ .

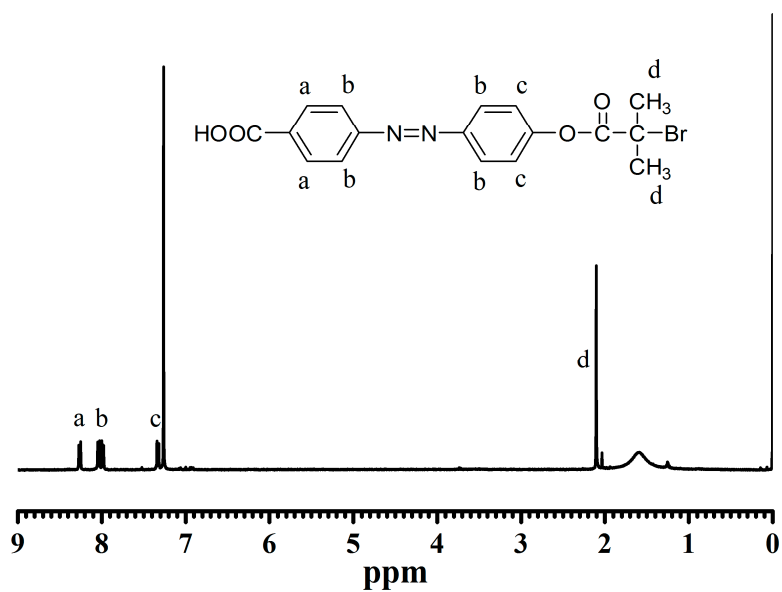

**Figure S5.**  $^1\text{H}$ -NMR spectrum of HOOC-Azo-Br in  $\text{CDCl}_3$ .

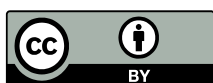

© 2016 by the authors; licensee MDPI, Basel, Switzerland. This article is an open access article distributed under the terms and conditions of the Creative Commons Attribution (CC-BY) license (<http://creativecommons.org/licenses/by/4.0/>).
